# Supplementary material for: Fabrication of a Disposable Amperometric Sensor for the Determination of Nitrite in Food
Source: MDPI journal article supplement (doi:10.3390/mi14030687), 2023-03-20
Supplement: s1 [file s1]

# Supporting Information for Fabrication of a Disposable Amperometric Sensor for the Determination of Nitrite in Food

Chao Liu, Daoming Chen, Chunnan Zhu, Xiaojun Liu, Yu Wang, Yuepeng Lu, Dongyun Zheng\*, Baorong Fu\*

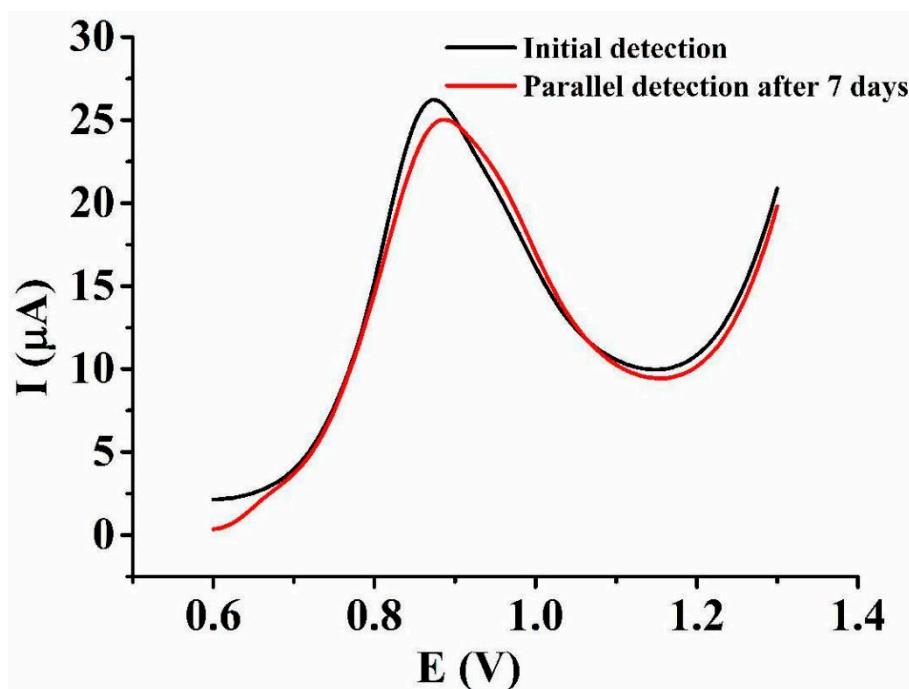

**Figure S1.** Differential pulse voltammograms of 1 mM nitrite on PTP-AgNP/PGE in 0.1 M phosphate buffer (pH = 4.0) at different time.

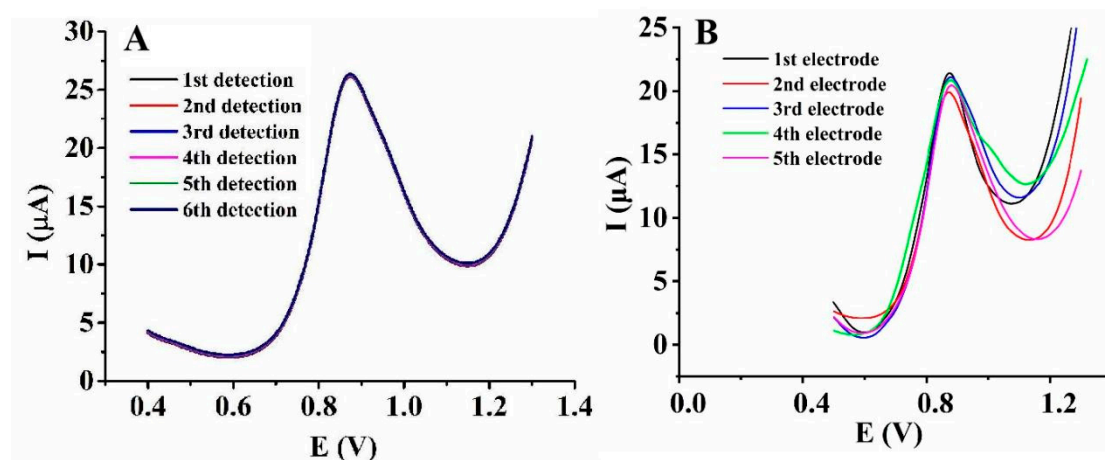

**Figure S2.** Parallel determination of 1 mM nitrite with one PTP-AgNP/PGE in 0.1 M phosphate buffer (pH = 4.0) for six times (A), and parallel determination of 1 mM nitrite with five PTP-AgNP/PGEs in 0.1 M phosphate buffer (pH = 4.0) (B).
